# **PREDICTORS FOR PARTICIPATION IN MASS-TREATMENT AND FEMALE GENITAL SCHISTOSOMIASIS RE-INVESTIGATION, AND THE EFFECT OF PRAZIQUANTEL TREATMENT IN SOUTH AFRICAN ADOLESCENTS**

**Takalani Girly Nemungadi<sup>1\*</sup>, Elisabeth Klepp<sup>2</sup>, Hashini Nilushika Galappaththi-Arachchige<sup>2</sup>, Pavitra Pillay<sup>3</sup>, Svein Gunnar Gundersen<sup>4</sup>, Birgitte Jyding Vennervald<sup>5</sup>, Patricia D. Ndhlovu<sup>6</sup>, Myra Taylor<sup>1</sup>, Saloshni Naidoo<sup>1</sup>, Eyrun F. Kjetland<sup>1,2</sup>**

<sup>1</sup>Discipline of Public Health Medicine, College of Health Sciences, University of KwaZulu-Natal, Durban, South Africa

<sup>2</sup> Norwegian Centre for Imported and Tropical Diseases, Oslo University Hospital, Oslo, Norway

<sup>3</sup>Department of Biomedical and Clinical Technology, Durban University of Technology, KwaZulu-Natal, South Africa

<sup>4</sup>Institute for Global Development and Planning, University of Agder, Kristiansand, Norway

<sup>5</sup>Section for Parasitology and Aquatic Pathobiology, Faculty of Health and Medical Sciences, University of Copenhagen, Copenhagen, Denmark

<sup>6</sup>BRIGHT Academy, Ugu District, South Africa

\*Corresponding author: Takalani Girly Nemungadi, University of KwaZulu-Natal, School of Nursing and Public Health, Durban, South Africa, 4041 (Email: takalaninemungadi@gmail.com)

**Keywords.** Female genital schistosomiasis; FGS symptoms; homogenous yellow patch; grainy sandy patch, mass drug administration, treatment.

NOTE: This preprint reports new research that has not been certified by peer review and should not be used to guide clinical practice.

21

**Type of Article:** Clinical Article

22

## ABSTRACT

### Objective

Female Genital Schistosomiasis (FGS) causes intravaginal lesions and symptoms that could be mistaken for sexually transmitted diseases or cancer. In adults, FGS lesions are refractory to treatment. The effect of treatment has never been explored in young women; it is unclear if gynaecological investigation will be possible in this young age group (16 – 23 years). We explored the predictors for accepting anti-schistosomal treatment and/or gynaecological reinvestigation in young women, and the effects of anti-schistosomal mass-treatment (praziquantel) on the clinical manifestations of FGS at an adolescent age.

### Method

The study was conducted in randomly selected, rural, high schools in Ilembe, uThungulu and Ugu Districts, KwaZulu-Natal Province, East Coast of South Africa. At baseline, after obtaining ethical approval and informed consent, gynaecological investigations were conducted in female learners in grades 8 to 12 (aged 16-23 years). Mass-treatment was offered in the low-transmission season between May and August (a few in September), in accordance with WHO recommendations. Reinvestigation was offered after a median of 9 months (range 5-14 months). Univariate, multivariable and logistic regression analysis were used to measure the association between variables.

### Results

Of the 2293 learners who came for baseline gynaecological investigations, 1045 (46%) had signs of schistosomiasis, 209/1045 (20%) had grainy sandy patches; 208/1045 (20%) homogenous yellow patches; 772/1045 (74%) had abnormal blood vessels; and 404/1045 (39%) were urine positive. Overall, only 26% (587/2293) learners participated in the mass treatment and 17% (401/2293) participated in the follow up gynaecological reinvestigations. More than 70% of learners with FGS lesions were lost to follow-up: 156/209 (75%) grainy sandy patches; 154/208 (74%) homogenous yellow patches; 539/722 (75%) abnormal blood vessels; 238/404 (23%) urine positive. The grade 12 pupil had left school and did not participate in the reinvestigations. Amongst those with lesions who came for both treatment and reinvestigation, 12 (of 19) still had grainy sandy patches, 8 (of 28) had homogenous yellow patches, and 54 (of 90) had abnormal blood vessels. Only 3 out of 55 remained positive for *S. haematobium* ova. The low mass treatment uptake and huge loss to follow up among those who had baseline FGS contributed to small sample size at follow up, to understand the effect of treatment. However, multivariable analysis showed that treatment had effect on the abnormal blood vessels (adjusted odds ratio = 2.1, 95% CI 1.1 – 3.9 and p 0.018). HIV, current water contact, water contact as a toddler and urinary schistosomiasis influenced participation in mass treatment. Grainy sandy patches, abnormal blood vessels, homogenous yellow patches, previous pregnancy, current water contact, water contact as a toddler and father present in the family were strongly associated with coming back for follow-up gynaecological investigation.

### Conclusion

Compliance to treatment and gynaecological reinvestigation was very low. There is need to embark on large scale awareness and advocacy in schools and communities before implementing mass-treatment and investigation studies. Further investigations with large

sample size are needed in order to fully understand the effect of treatment on FGS lesions, including the right timing for treatment.

## AUTHOR SUMMARY

Female genital schistosomiasis (FGS) is a neglected tropical disease and it affects many women and young girls in schistosomiasis endemic areas. A lot of research is still needed to understand the characteristics of FGS, its prevention, as well as the timing for treatment. As a result of the limited information, some women who suffer from FGS end up being diagnosed as suffering from diseases such as human papilloma virus or other sexually transmitted diseases. The study highlights issues that need to be taken into considerations when providing treatment or conducting mass treatment for schistosomiasis and FGS or planning gynaecological investigations to inform FGS control programmes. In this study of adolescent girls and young women of KwaZulu-Natal Province of South Africa, we sought to explore the factors that influence participation in mass treatment and gynaecological investigation, and investigating the effect of praziquantel treatment on FGS. Factors that influenced participation in mass treatment included HIV, current water contact, water contact as a toddler and urinary schistosomiasis. Factors that influenced participation in follow up gynaecological investigation included grainy sandy patches, abnormal blood vessels, homogenous yellow patches, previous pregnancy, current water contact, water contact as a toddler and father present in the family. There was low uptake and huge loss to follow up for mass treatment, and this contributed to small sample size for follow up gynaecological investigations to understand the effect of treatment. However, multivariable analysis showed that treatment had effect on the abnormal blood vessels and not on grainy sandy patches and homogenous yellow patches.

## INTRODUCTION

Female Genital Schistosomiasis (FGS) is a complication of schistosomiasis that results from trapped schistosome eggs, which damage tissues and organs (1,2). It is known to affect females of all age groups. FGS has a complex disease manifestation spectrum, including lesions of the cervix and vagina (grainy sandy patches and homogenous yellow patches), surface bleeding, abnormal blood vessels and rubbery papules (3,4). FGS has also been associated with sub-fertility or infertility, ectopic pregnancy, spontaneous abortion, premature birth, and increased susceptibility to HIV transmission and possibly progression. Reports suggest that eggs are evenly distributed in the genital organs (2,5–7). There are many case reports of concurrent FGS with cervical intra-epithelial neoplasia and one paper to date has shown lower Human Papillomavirus (HPV) clearance in FGS positive women or increased susceptibility to HPV (3,8–12).

WHO recommends mass drug administration in schistosomiasis endemic schools for prevention of morbidity, and studies indicate that early treatment may be necessary to prevent genital lesions in adulthood (13–15). **In South Africa, there is no mass treatment or mass drug administration programme** for schistosomiasis and treatment is case-by-case upon consultation by the affected individuals. The mass treatment that was conducted between 1998 and 2001 in KwaZulu-Natal was discontinued due to resource constraints (16,17). FGS is not known among most health care workers, clinicians and community members and only approximately 160 gynaecologists were previously informed about FGS in South Africa (16–19). As a result, FGS is not considered a priority condition. There is therefore limited data and research and this leads to a low index of suspicion by clinicians and FGS lesions often being misclassified as sexually transmitted infections or cervical cancer (2,5,20–27). There have been efforts by authorities in South Africa to mobilise WHO-donated

praziquantel in order to implement the mass treatment as per the recommended WHO strategy over the past years. However, this has been a challenge since, the donated praziquantel is not registered in the country and is not permitted to be used (28). Subsequently, treatment has been mobilised from within the country and mass treatment is being planned for implementation (29). In order to prevent low uptake and to properly plan for the roll-out of the mass treatment, it is important to identify factors that will influence participation, and to determine the effect of treatment on FGS symptoms. **It is also important to identify factors that will influence participation in gynaecological investigation in order to improve treatment and other prevention and control measures as well as research information that will provide new knowledge.**

Between 2011 and 2013, we conducted a follow-up study and sought to explore the feasibility of the implementation of mass drug administration and gynaecological investigations in school-going young women in rural KwaZulu-Natal, and to explore the effects on lesions and symptoms.

## MATERIALS AND METHODS

**Ethical considerations.** The study was approved by the Biomedical Research Ethics Committee (BREC), University of KwaZulu-Natal (Ref BF029/07), KwaZulu-Natal Department of Health (Reference HRKM010-08) and the Regional Committee for Medical and Health Research Ethics (REC), South Eastern Norway. The ethical committees were aware that minors were invited into the study and specifically approved independent minor consent without parental consent. All study participants were offered anti-schistosomal treatment and, if applicable, treatment for sexually transmitted diseases, and/or referral to the local health system for treatment of HIV.

144

145 **Study subjects and area.** The study was conducted between 2011 and 2015 in the KwaZulu-  
 146 Natal Province of South Africa. The participants were female learners aged 16 – 23 years, from  
 147 randomly selected high schools in Ilembe, uThungulu and Ugu Districts on the East Coast of  
 148 South Africa that had not undergone anti-schistosomal mass-treatment before the first  
 149 investigation as shown in Table 1. The participants were recruited from schools that were  
 150 classified as rural by the South African Department of Basic Education and were below the  
 151 altitude of 400 meters above sea level, with an estimated prevalence of *S. haematobium* of  
 152 10% or more based on an initial show of hands for red urine in Ugu District and a haematuria  
 153 dipstick survey in Ilembe and uThungulu districts (30). Gynaecological examinations were  
 154 performed in two research clinics (North of Durban and South of Durban); virgins, pregnant,  
 155 and severely ill females were excluded. Schools with prevalence of less than 10% were  
 156 excluded

**Table 1.** Study design and practicalities, their rationale, and the potential unintended consequences

| Inclusion considerations                                                                                                                    | Reason                                                                                                                                                                                                                                                                                                                                                                                                                                                                                                                                                                                                                                                                                                   |
|---------------------------------------------------------------------------------------------------------------------------------------------|----------------------------------------------------------------------------------------------------------------------------------------------------------------------------------------------------------------------------------------------------------------------------------------------------------------------------------------------------------------------------------------------------------------------------------------------------------------------------------------------------------------------------------------------------------------------------------------------------------------------------------------------------------------------------------------------------------|
| Participants included were 16 years and above, including Grade 12                                                                           | In order to explore reversibility of lesions, we wished to invite young women at an earliest possible time for a gynaecological investigation. However, gynaecological investigations are not practically feasible before the age of 16 for cultural, legal and sometimes anatomical reasons (31). Average sexual debut age is 18.7 years in South Africa and many hide sexual debut from e.g. their parents and teachers for as long as they can (32,33).<br><br>Moreover, some may be worried about the "loss of virginity" during speculum examination (34,35). Visual inspection of the cervix, fornices and vaginal surfaces before sexual debut may therefore be offensive to their sensibilities. |
| KwaZulu-Natal was chosen as the study area                                                                                                  | Firstly, at this tender age, chances were high that these young women would be invited for their first gynaecological examination. Some amongst the pupils might be found to have been raped and a gynaecological examination might trigger psychological reactions. Therefore, we looked for a study area where psychologists and support centres would be available for study participants in a schistosomiasis endemic area. Secondly, there are more than 4,000 rural schools in KZN and we estimated that we would be able to reach the necessary sample size (36,37).                                                                                                                              |
| Although some young women with multiple lesions were treated at the clinic, most were not done immediately after examination at the clinic. | Treatment with praziquantel was done at schools, not at the research clinics for the following reasons:<br>1) Mass Drug Administration is recommended so that siblings and class mates are treated simultaneously (15)<br>2) Anti-schistosomal treatment with Praziquantel should be given in the low-transmission season (28,38)<br>3) Praziquantel may cause nausea and sometimes vomiting; if treatment had been done at clinic immediately after investigation, some learners might become car sick on the way from the clinic, it could potentially scare others from participating (15).                                                                                                           |

**Questionnaires and clinical examinations.** Group information, individual information and the consent form procedure was done at the school over a 2-week-period. Consent forms and parent information were distributed in advance (39–41). The investigation has been described previously. Briefly, a questionnaire on water contact, reproductive history, genital and abdominal symptoms was administered individually to participants in isiZulu (the local language) prior to gynaecological examination (30). Teachers would suggest days when it would be suitable to fetch learners from schools to go to the research clinic. Teenagers had indicated they were embarrassed to give urine in school so urine was collected only while

they were at the clinic. On pre-reserved days, a female driver, trained and well-informed about the study, would pick up 4-13 participants (depending on the vehicle size) for the drive to the clinic for gynaecological examinations.

**Treatment.** In accordance with the WHO policy for areas of high schistosomiasis endemicity, mass treatment of participants and other learners in enrolled schools was carried out during the winter season (low-transmission season) after the baseline gynaecological examination. Treatment began after lunch to ensure that the children had eaten their free school lunches before treatment and to save the costs on food for the programme. Depending on the size of school, the treatment team comprised of 2-4 nurses and 2-4 assistants (27). Bread and bananas were distributed to learners who had not received a school lunch. Learners with signed consent forms were weighed, and the number of praziquantel tablets was calculated for the dose of 40 mg per kg of body weight. As described previously, a designated nurse directly observed all tablet ingestion by counting the number of tablets in each learner's hand and watching for hand-to-mouth intake (27). The treatment team stayed in the school for an hour after the last dose to allow learners to report any side effects. All learners, even the untreated, were allowed to come back for follow-up gynaecological examination.

**Sample size calculation and statistical analyses.** Demographic and clinical variables were explored as predictors for (1) participation in mass-treatment and (2) returning to a follow-up gynaecological investigation. We planned a study of independent cases and controls with 3 control(s) per case. Prior data indicated that the probability of coming back for a gynaecological investigation among those with FGS disease is 15%. If the true probability of FGS among those who do not return is 9%, we will need to study 318 FGS patients and 954 without FGS to be able to reject the null hypothesis that the exposure rates for the groups

are equal with probability (power) 80%. The type I error probability associated with this test of this null hypothesis is 0.05. We will use an uncorrected chi-squared statistic to evaluate this null hypothesis.

In order to study simultaneously the impact of several variables, logistic regression analysis was applied with a 5% significance level; as a general rule variables were included if the p-value from the crude association was less than 0.2 and if the Spearman rank correlation coefficient was below 0.7. Age was forced into the model.

To assess the overlap of the FGS lesions among the learners, we created Venn diagrams using Venny version 2.1 (Juan Carlos Oliveros, <https://bioinfogp.cnb.csic.es/tools/venny/index2.0.2.html>)

## RESULTS

### Description of the study population.

A total of 2293 adolescent girls and young women from 70 secondary schools were enrolled and examined gynaecologically for FGS lesions at baseline. As shown in Figure 1, 1045/2293 (46%) learners had genital lesions or signs of urinary schistosomiasis at baseline. None of them had rubbery papules. Abnormal blood vessels were the most common findings.

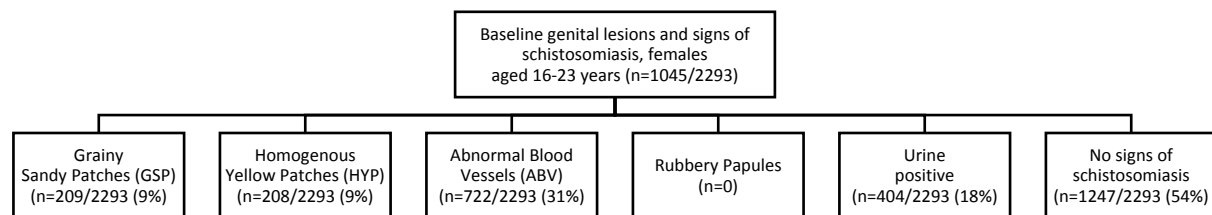

Figure 1. Genital lesions and signs for schistosomiasis amongst adolescent girls and young women in Kwa-Zulu-Natal between 2012 and 2013.

As shown in Figure 2, 271 learners had more than one FGS lesions while 556 had only one FGS lesion (ABV: abnormal blood vessels, GSP: grainy sandy patches, HYP: homogenous yellow patches).

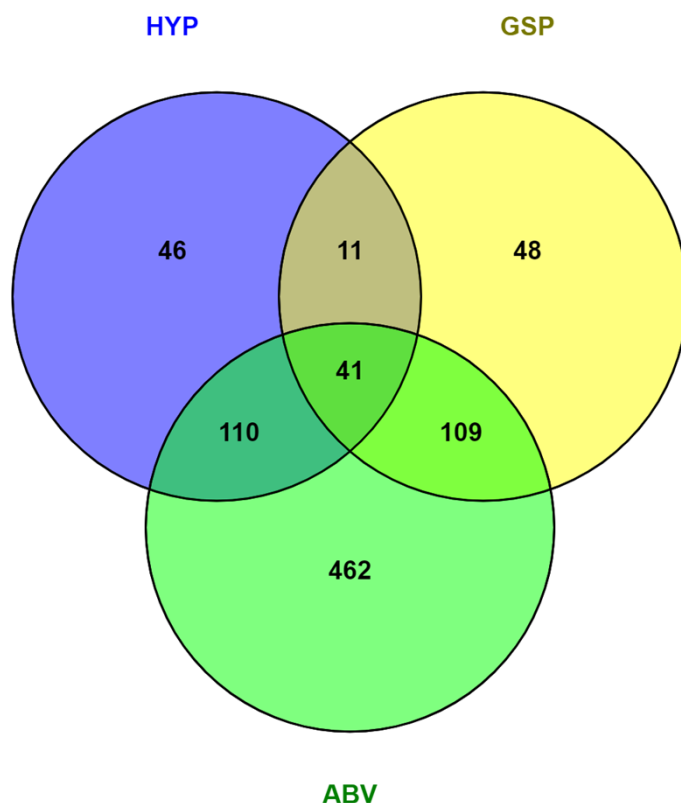

Figure 2. Venn diagram showing an overlap of baseline FGS lesions among learners.

### Mass treatment participation

Treatment with praziquantel (40mg/kg) was given in the low-transmission season (South African winter between May and August, including a few in September). Only 26% (587 of the 2293) learners were treated between baseline and follow-up. Multivariable analysis showed that HIV, current water contact, water contact as a toddler and urinary schistosomiasis positively influenced learners' willingness to participate in the mass treatment (Table 2). A greater loss to follow-up for mass treatment was observed in the Southern research clinic as compared to the Northern clinic (odds ratio = 2.1, 95% CI 1.7 – 2.6 and  $p < 0.001$ ).

Table 2. Underlying factors and compliance with mass-treatment

| History                      | Participated in mass treatment (%) | Did not participate in mass treatment (%) | Univariate analysis |                         |         | Multivariable analysis |                         |                    |
|------------------------------|------------------------------------|-------------------------------------------|---------------------|-------------------------|---------|------------------------|-------------------------|--------------------|
|                              |                                    |                                           | Odds ratio          | 95% Confidence Interval | p-value | Adjusted odds ratio    | 95% Confidence Interval | p-value            |
| Grade 8                      | 4/209 (2)                          | 6/1026 (1)                                | 1                   |                         |         | 1                      |                         |                    |
| Grade 9                      | 13/209 (6)                         | 43/1026 (4)                               | 0.9                 | 0.3-2.6                 | 0.913   | 0.7                    | 0.2-2.3                 | 0.600              |
| Grade 10                     | 51/209 (24)                        | 277/1026 (27)                             | 0.6                 | 0.2-1.5                 | 0.274   | 0.4                    | 0.2-1.2                 | 0.113              |
| Grade 11                     | 128/209 (61)                       | 507/1026 (49)                             | 0.6                 | 0.3-1.7                 | 0.389   | 0.5                    | 0.2-1.5                 | 0.249              |
| Grade 12                     | 13/209 (6)                         | 193/1026 (189)                            | 0.9                 | 0.3-2.3                 | 0.813   | 0.6                    | 0.2-0.7                 | 0.346              |
| Current water contact        | 391/587 (59)                       | 596/1050 (57)                             | 1.5                 | 1.2 – 1.9               | <0.001  | 1.4                    | 0.1-1.8                 | 0.003              |
| Urinary schistosomiasis      | 90/517 (17)                        | 193/895 (22)                              | 0.8                 | 0.6 – 1.0               | 0.060   | 0.7                    | 0.5-0.9                 | 0.037              |
| Abnormal blood vessels       | 215/587 (37)                       | 337/1050 (32)                             | 1.2                 | 0.9 – 1.5               | 0.063   | 1.1                    | 0.8-1.3                 | 0.680 <sup>a</sup> |
|                              |                                    |                                           |                     |                         |         | 1.1                    | 0.9-1.4                 | 0.245 <sup>b</sup> |
| Water contact as toddler     | 339/587 (58)                       | 611/1050 (58)                             | 1.5                 | 1.2 – 1.9               | <0.001  | 1.4                    | 1.1-1.8                 | 0.002              |
| HIV                          | 86/555 (15)                        | 210/999 (21)                              | 0.7                 | 0.5 – 0.9               | 0.008   | 0.7                    | 0.5-0.9                 | 0.015              |
| Red urine previously or now  | 155/587 (26)                       | 320/1045 (31)                             | 0.8                 | 0.6 – 1.0               | 0.072   | 0.8                    | 0.7-1.1                 | 0.138              |
| Mother present in the family | 375/587 (64)                       | 625/1045 (60)                             | 1.2                 | 0.9 – 1.5               | 0.105   | 1.3                    | 0.9-1.6                 | 0.055              |
| Homogenous yellow patch      | 60/587 (10)                        | 90/1050 (9)                               | 1.2                 | 0.9 – 1.7               | 0.267   |                        |                         |                    |
| Has ever been pregnant       | 280/587 (48)                       | 504/1050 (48)                             | 0.9                 | 0.8 – 1.2               | 0.907   |                        |                         |                    |
| Heavy bleeding with clots    | 176/408 (43)                       | 350/755 (46)                              | 0.9                 | 0.7 – 1.1               | 0.292   |                        |                         |                    |
| Father present in the family | 136/587 (23)                       | 251/1045 (24)                             | 0.9                 | 0.8 – 1.2               | 0.698   |                        |                         |                    |
| Genital itch                 | 361/587 (61)                       | 658/1046 (63)                             | 0.9                 | 0.8 – 1.2               | 0.573   |                        |                         |                    |
| Genital burn                 | 243/587 (41)                       | 464/1046 (44)                             | 0.9                 | 0.7 – 1.1               | 0.246   |                        |                         |                    |
| Genital sore/ulcer           | 114/585 (19)                       | 206/1043 (20)                             | 0.9                 | 0.8 – 1.3               | 0.898   |                        |                         |                    |
| Genital lump                 | 93/583 (16)                        | 176/1038 (17)                             | 0.9                 | 0.7 – 1.2               | 0.602   |                        |                         |                    |
| Urge with leak               | 270/587 (46)                       | 499/1045 (48)                             | 0.9                 | 0.8 – 1.1               | 0.496   |                        |                         |                    |
| Urge                         | 202/585 (35)                       | 346/1044 (33)                             | 1.1                 | 0.9 – 1.3               | 0.569   |                        |                         |                    |
| Dysuria                      | 297/587 (35)                       | 550/1044 (52)                             | 0.9                 | 0.8 – 1.1               | 0.418   |                        |                         |                    |
| Bloody discharge             | 104/583 (17)                       | 198/1043 (19)                             | 0.9                 | 0.7 – 1.2               | 0.569   |                        |                         |                    |
| Watery discharge             | 369/583 (63)                       | 638/1039 (61)                             | 1.1                 | 0.9 – 1.3               | 0.452   |                        |                         |                    |
| Abnormal discharge smell     | 260/583 (45)                       | 490/1042 (47)                             | 0.9                 | 0.7 – 1.1               | 0.346   |                        |                         |                    |
| <b>Grainy sandy patch</b>    | 49/587 (8)                         | 102/1050 (8)                              | 0.8                 | 0.6 – 1.2               | 0.359   |                        |                         |                    |

<sup>a</sup>multivariable with abnormal blood vessels and current water contact, <sup>c</sup>multivariable with abnormal blood vessels and water contact as a toddler.

## Gynaecological reinvestigation

Table 3 shows that a total of 709 learners (31% of the 2293 learners) were interviewed at follow up. Of the 709, 398 agreed to participate in the follow up gynaecological investigation; the majority (32%) felt that they were not ready. The willing participants were reinvestigated after a median of 9 months (range 5 - 14 months). The median age of those followed-up was 19 years (range 16 - 23 years), and those who were lost to follow-up had a median age of 18 years (range 16 – 23 years).

Table 3. Reasons for refusing follow up gynaecological examination (n=709)

| Reasons for denying or aborting gynaecological examination | Came for follow up |                 | Total (%)        |
|------------------------------------------------------------|--------------------|-----------------|------------------|
|                                                            | No (%)             | Yes (%)         |                  |
| Did not deny or abort                                      | 16 (3.9)           | 398 (%)         | 414 (100)        |
| Fear                                                       | 26 (100)           | 0 (0)           | 26 (100)         |
| Not ready                                                  | 127 (100)          | 0 (0)           | 127 (100)        |
| Menstruation                                               | 24 (92)            | 2 (8)           | 26 (100)         |
| Virgin                                                     | 14 (100)           | 0 (0)           | 14 (100)         |
| Pregnant                                                   | 53 (100)           | 0 (0)           | 53 (100)         |
| Other                                                      | 48 (98)            | 1 (2)           | 49 (100)         |
| <b>TOTAL</b>                                               | <b>308 (43)</b>    | <b>401 (57)</b> | <b>709 (100)</b> |

Table 4 show factors that may have contributed to compliance with follow up gynaecological investigation. The three FGS lesions (grainy sandy patches, abnormal blood vessels and homogenous yellow patches), previous pregnancy, current water contact, water contact as a toddler and father present in the family were strongly associated with coming back for a follow-up investigation in both univariate and multivariable analysis. Multivariable analysis of the three FGS lesions individually (to account for a causal relationship) with current water contact, previous pregnancy and water contact as a toddler had no effect on the association. A greater loss to follow-up for gynaecological investigation was observed in the Southern research clinic as compared to the Northern clinic (odds ratio = 1.9, 95% CI 1.5 – 2.4 and p <0.001).

Table 4. Underlying factors associated with coming back for follow-up gynaecological investigations

| History                        | Came for follow-up (%) | Did not come for gynaecological investigation | Univariate analysis |                         |         | Multivariable analysis |                         |         |
|--------------------------------|------------------------|-----------------------------------------------|---------------------|-------------------------|---------|------------------------|-------------------------|---------|
|                                |                        |                                               | Odds ratio          | 95% Confidence Interval | p-value | Adjusted odds ratio    | 95% Confidence Interval | p-value |
| Grade 8                        | 5/400 (1)              | 18/1863 (1)                                   | 1                   |                         |         | 1                      |                         |         |
| Grade 9                        | 24/400 (7)             | 92/1863 (5)                                   | 0.9                 | 0.3-2.8                 | 0.910   | 0.8                    | 0.3-2.5                 | 0.724   |
| Grade 10                       | 120/400 (30)           | 488/1863 (26)                                 | 0.9                 | 0.3-2.4                 | 0.813   | 0.8                    | 0.3-2.2                 | 0.635   |
| Grade 11                       | 214/400 (54)           | 742/1863 (40)                                 | 1.0                 | 0.4-2.8                 | 0.941   | 0.9                    | 0.3-2.5                 | 0.803   |
| Grade 12                       | 37/330(6)              | 523/1863 (28)                                 | 0.3                 | 0.1-0.7                 | 0.010   | 0.2                    | 0.1-0.6                 | 0.004   |
| Grainy sandy patch*            | 56/401 (14)            | 153/1892 (8)                                  | 1.8                 | 1.3-2.6                 | <0.001  | 1.8                    | 1.3-2.6                 | <0.001  |
| Abnormal blood vessels*        | 185/401 (46)           | 537/1892 (28)                                 | 2.3                 | 1.7-2.7                 | <0.001  | 2.2                    | 1.7-2.7                 | <0.001  |
| Homogenous yellow patch*       | 55/401 (14)            | 153/1892 (8)                                  | 1.8                 | 1.3-2.5                 | <0.001  | 1.8                    | 1.3-2.5                 | 0.001   |
| Has ever been pregnant         | 236/401 (60)           | 838/1892 (44)                                 | 1.8                 | 1.4-2.2                 | <0.001  | 1.8                    | 1.5-2.3                 | <0.001  |
| Water contact as toddler       | 260/401 (65)           | 1119/1892 (59)                                | 1.3                 | 1.0-1.6                 | <0.034  | 1.4                    | 1.1-1.7                 | 0.009   |
| Current water contact          | 257/401 (64)           | 1124/1892 (59)                                | 1.2                 | 0.9 - 1.5               | 0.082   | 1.4                    | 1.1-1.7                 | 0.012   |
| Red urine previously or now    | 110/398 (28)           | 571/1883 (30)                                 | 0.9                 | 0.7 – 1.1               | 0.287   | 0.8                    | 0.6-1.1                 | 0.140   |
| Father present in the family   | 71/398 (19)            | 454/1881 (24)                                 | 0.7                 | 0.5 – 0.9               | 0.007   | 0.7                    | 0.5-0.9                 | 0.010   |
| Genital lump                   | 65/394 (17)            | 311/1872 (17)                                 | 0.9                 | 0.7 – 1.3               | 0.955   |                        |                         |         |
| Condom use                     | 130/319 (41)           | 649/1604 (41)                                 | 1.0                 | 0.8 – 1.3               | 0.923   |                        |                         |         |
| Heavy bleeding with clots      | 113/259 (44)           | 628/1403 (45)                                 | 0.9                 | 0.7 – 1.2               | 0.736   |                        |                         |         |
| HIV                            | 83/386 (22)            | 356/1794 (20)                                 | 1.1                 | 0.8 – 1.4               | 0.461   |                        |                         |         |
| Mother present in the family   | 231/399 (58)           | 1136/1880 (60)                                | 0.9                 | 0.7 – 1.1               | 0.349   |                        |                         |         |
| Genital itch                   | 253/399 (63)           | 1155/1884 (61)                                | 1.1                 | 0.9 – 1.4               | 0.433   |                        |                         |         |
| Genital burn                   | 179/399 (45)           | 809/1884 (43)                                 | 1.1                 | 0.9– 1.3                | 0.482   |                        |                         |         |
| Genital sore/ulcer             | 77/398 (19)            | 347/1879 (19)                                 | 1.1                 | 0.8 – 1.4               | 0.682   |                        |                         |         |
| Urge with leak (urgenic1)      | 200/398 (50)           | 882/1883 (47)                                 | 1.1                 | 0.9 – 1.4               | 0.216   |                        |                         |         |
| Urge but no leak (urge1)       | 137/392 (35)           | 639/1881 (34)                                 | 1.0                 | 0.8 – 1.3               | 0.837   |                        |                         |         |
| Dysuria                        | 217/398 (55)           | 982/1882 (52)                                 | 1.1                 | 0.9 – 1.4               | 0.395   |                        |                         |         |
| Bloody discharge               | 70/397 (18)            | 356/1875 (19)                                 | 0.9                 | 0.7 – 1.2               | 0.530   |                        |                         |         |
| Watery discharge               | 252/396 (64)           | 1168/1872 (62)                                | 1.1                 | 0.8 – 1.3               | 0.642   |                        |                         |         |
| Abnormal discharge smell       | 179/399 (45)           | 878/1869 (47)                                 | 0.9                 | 0.7 – 1.1               | 0.442   |                        |                         |         |
| <b>Urinary schistosomiasis</b> | 82/367 (22)            | 322/1579 (20)                                 | 1.1                 | 0.9 – 1.5               | 0.407   |                        |                         |         |

\*Were analysed separately because some participants were affected by more than one lesion and there may be causal relationship between the three FGS lesions.

On the baseline investigation day, participants were informed about genital lesions (grainy sandy patches, homogenous yellow patched and abnormal blood vessels) but urine microscopy results were not readily available as the laboratory investigation were still going on. However, only approximately 25% of the young women with lesions returned for follow-up examinations (Figure 3, bold frame). As shown in Figure 3 (hatched frame), more than 70% of learners that had genital lesions or signs of FGS at baseline were lost to follow up for gynaecological investigation, and 23% of learners with urinary schistosomiasis were lost to follow-up.

263

264

Figure 3. Follow-up amongst adolescent girls and young women investigated for Female Genital Schistosomiasis in Kwa-Zulu-Natal.

Legend:

Hatched frame: lost to follow-up for gynaecological investigation.

Bold frame: Remaining findings at follow-up gynaecological investigation

270

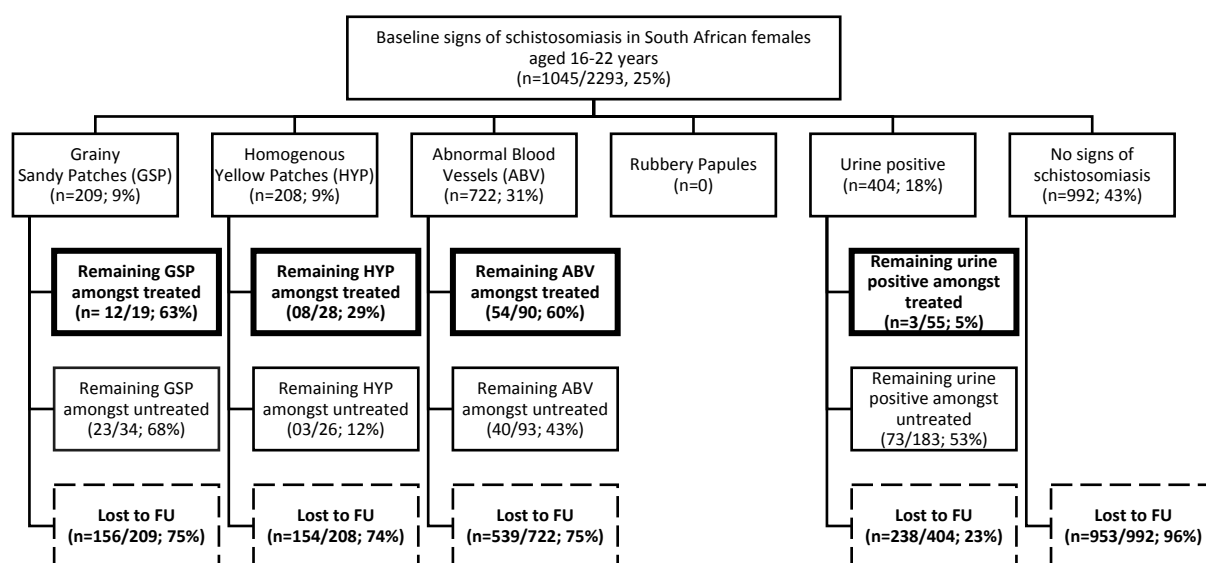

## The effect of treatment

Multivariable analysis of the effect of treatment on baseline FGS showed that treatment only had an effect on the abnormal blood vessels (adjusted odds ratio = 2.1, 95% CI 1.1 – 3.9 and p 0.018) (Table 5). Treatment was protective against urinary schistosomiasis; only 3 learners among the 55 that were treated remained positive for urinary schistosomiasis at follow up (adjusted odds ratio = 0.4, 95% CI 0.01 – 0.1 and p < 0.001).

Before accounting for FGS lesions at baseline (including those with and without FGS lesions at baseline), the univariate analysis showed a strong association between treatment and two FGS lesions (homogenous yellow patches and abnormal blood vessels); at multivariable analysis this association remained unchanged for the abnormal blood vessels (adjusted odds ratio = 2.3, 95% CI 1.5 – 3.6 and p <0.001) (Table 5) whereas it became insignificant for homogenous yellow patches.

Table 5. Effect of treatment - remaining FGS lesions among the treated and untreated

| FGS lesions                                                                                                    | Treated (%) | Untreated (%) | Univariate analysis |            |         | Multivariable analysis |            |         |
|----------------------------------------------------------------------------------------------------------------|-------------|---------------|---------------------|------------|---------|------------------------|------------|---------|
|                                                                                                                |             |               | OR                  | 95% CI     | p-value | AOR                    | 95% CI     | p-value |
| Effect of treatment among those with FGS a baseline                                                            |             |               |                     |            |         |                        |            |         |
| Grainy sandy patches                                                                                           | 12/19 (63)  | 23/34 (68)    | 0.8                 | 0.3 – 2.7  | 0.741   | 0.5                    | 1.1 – 2.1  | 0.369   |
| Homogenous yellow patches                                                                                      | 08/28 (29)  | 03/26 (12)    | 3.1                 | 0.7 – 3.2  | 0.120   | 6.7                    | 0.9 - 48   | 0.058   |
| Abnormal blood vessels                                                                                         | 54/90 (60)  | 40/93 (43)    | 1.9                 | 1.1 – 3.6  | 0.022   | 2.1                    | 1.1 – 3.9  | 0.018   |
| Urinary schistosomiasis                                                                                        | 3/55 (5)    | 73/183 (53)   | 0.5                 | 0.02 - 0.2 | <0.001  | 0.4                    | 0.01 – 0.1 | <0.001  |
| Overall FGS rate at follow up (after treatment and including FGS among those who did not have FGS at baseline) |             |               |                     |            |         |                        |            |         |
| Grainy sandy patches                                                                                           | 25/167 (15) | 35/229 (15)   | 0.9                 | 0.6 – 1.7  | 0.931   | 0.9                    | 0.5 – 1.7  | 0.903   |
| Homogenous yellow patches                                                                                      | 24/167 (14) | 17/229 (07)   | 2.1                 | 1.1 – 4.0  | 0.025   | 1.8                    | 0.9 – 3.5  | 0.096   |
| Abnormal blood vessels                                                                                         | 81/167 (49) | 66/229 (29)   | 2.3                 | 1.5 – 3.5  | <0.001  | 2.3                    | 1.5 – 3.6  | <0.001  |
| Urinary schistosomiasis                                                                                        | 07/351 (02) | 91/681 (13)   | 0.1                 | 0.1 – 0.3  | <0.001  | 0.1                    | 0.1 – 0.3  | <0.001  |

## DISCUSSION

The abnormal blood vessels were refractory to praziquantel treatment. Abnormal blood vessels and grainy sandy patches were previously found to be significantly associated with the presence of live worms as opposed to the homogenous yellow patches (42). The association between praziquantel treatment and abnormal blood vessels may be an indication that abnormal blood vessels are an early stage of the grainy sandy patches and are easy to eliminate as opposed to the grainy sandy patches and homogenous yellow patches. It is important to note that different investigators define the investigation findings differently and that the investigators of gynaecological examinations were different in baseline and follow-up studies.

South Africa is not implementing mass drug administration (43); the remaining gynaecological symptoms among the treated were high and may be an indication that for effectiveness, several rounds of treatment are required and should be started at an earlier age. This supports findings in Zimbabwe where a standard single-dose of praziquantel did not have effect on the inflammatory lesions of FGS that had formed and developed over a few years (13). The timing for follow up investigations may have been too soon for some learners to determine the true effect of treatment (the median time period between praziquantel (40mg/kg) treatment and reinvestigation was 5 months (range 5 – 14 months).

Treatment with praziquantel is the only recommended effective way of killing adult helminths and mature live eggs, but has no effect on the calcified ova; early treatment is therefore crucial before the ova are deposited in the tissue and cause damage (6,44). This may possibly explain the remaining gynaecological symptoms among the treated, including those who did

not have the lesions at baseline. A retrospective study found that treatment at an early age seems to prevent gynaecologic morbidity (13).

Lack of a regular mass treatment programmes in South Africa, repeated exposure to risky water, and re-infections could have led to continuous FGS lesions even after a single dose of praziquantel. Further investigations and follow up studies are therefore needed in countries that are implementing mass drug administration and areas that are not implementing mass drug administration. These studies will help with information to fully understand the differences between the FGS lesions and whether praziquantel treatment can eliminate these lesions, including the right timing to possibly eliminate the lesions. Currently, only one study has investigated the impact of treatment on gynaecological lesions and found no significant change in the adult sandy patches and contact bleeding over a 12-month period, even though urinary egg excretion ceased (45). Another study found that schistosomiasis PCR remained positive in the genitals after treatment (46). The lack of information and complexity in conducting research on how long it takes for the FGS lesions to manifest following infection made it difficult to determine whether the FGS lesions diagnosed at follow-up were due to schistosomiasis re-infection or were progressive lesions that had not yet manifested and therefore diagnosed at baseline. Lack of a regular mass treatment programme in South Africa, repeated exposure to risky water, and re-infections could have led to continuous FGS lesions even after a single dose of praziquantel.

Identification of HIV, current water contact, water contact as a toddler and urinary schistosomiasis as factors that influenced learners to participate in mass treatment are in consistent with the general knowledge of the impact of these factors on schistosomiasis i.e. schistosomiasis as a risk factor for HIV, and water contact as a risk for schistosomiasis. The

pre-treatment health education may have played a role in influencing these participants to accept the treatment. Learners who felt they do not have a problem with these identified factors may have perceived it unnecessary for them to get treated. Furthermore, the three FGS lesions (grainy sandy patches, abnormal blood vessels and homogenous yellow patches), previous pregnancy, current water contact, water contact as a toddler and father present in the family were strongly associated with returning for follow-up investigation. It is anticipated that the investigators at the Northern clinic had gained more experience in both health education and community engagement as opposed to when they conducted investigations at the Southern clinic (the 1<sup>st</sup> investigation site) where there was a greater loss to follow up. Therefore, active ongoing community engagement targeting both learners, parents and the entire community at risk is crucial in order to empower the community with the full knowledge on prevention and control that will enable them to make informed decisions.

South Africa is endemic for schistosomiasis with some focal areas having high and moderate infections (42), and FGS studies among the young population may help identify targeted interventions. Study findings revealed that more than 20% of the adolescent women in KwaZulu-Natal province had three well-known genital mucosal manifestations of FGS (30); in Limpopo Province, FGS accounted for 87.6% of the female cases in a study that described the pathology of biopsy diagnosed schistosomiasis (47). However, treatment in South Africa is still case-based and, as in many other countries, most community members do not seek early treatment or do not seek treatment at all (17,27,48). Therefore, those infected and those that complicate to FGS remain infected or with FGS complication; some individuals are misdiagnosed as sexually transmitted infections (STIs) or cervical cancer (2,5,20–27). In this study, loss to follow up was a major challenge. Involving community health workers in FGS studies may assist with managing those who are lost to follow up because it would be easier

for them to maintain contact and follow up with the learners in their catchment area, especially those found to have FGS symptoms.

It is important to note that gynaecological examination was not possible among the early and middle adolescent group due to virginity, fear, pregnancy, and privacy and other related issues. Early adolescence and some middle adolescence may only be targeted for prevention and only examined at the late adolescence stage to check if they developed any FGS after repeated treatment. Observational studies in young adolescents and adults are critical in determining the effect of early treatment on schistosomiasis and FGS. It is similarly important to determine the burden of infertility among those living in endemic areas and determine the association with FGS. Therefore, it is important for countries such as South Africa to establish mass drug administration programmes in order to prevent sustained infections that can lead to FGS.

The high loss to follow up is worrying because more knowledge is required through research to understand FGS pathogenesis and improve the knowledge of clinicians. For instance, it is important to note that the high loss to follow during mass treatment in this study contributed to small sample size to determine the effect of treatment on FGS. Currently, the lack of knowledge of FGS among most clinicians and affected communities is concerning due to the reported high prevalence of genital lesions (49). It has been reported that up to 75% of all women and girls infected with urinary *S. haematobium* have lesions in the uterus, cervix, vagina or vulva (4). Many women have been reported to have genital schistosomiasis without urinary excretion of *S. haematobium* eggs (2,4,13,50,51). In sub-Saharan Africa, it is estimated that 56 million women have FGS (2).

In addition to the identified unintended consequences due to inclusion criteria and research actions reported under results, the high loss to follow-up and low treatment coverage in this study could also be attributed to factors that were reported by another study in South Africa in Ugu District of KwaZulu-Natal Province. This Ugu District study was conducted among grade 10 – 12 learners, teachers, community health workers and traditional healers (16,17). Factors that contributed to low coverage in this Ugu District study were reported to be:

- older age group;
- lack of knowledge;
- attending a large school
- parental control and a closer teacher follow-up in younger children and in small schools;
- misconceptions that schistosomiasis is a self-healing disease and symptoms confused with sexually transmitted infections;
- the chronicity of the disease is not known to the general population;
- teasing and stigma;
- schistosomiasis-related absenteeism that may reach 30% on some days;
- tablets must be distributed by health professionals in South Africa;
- schools reluctant to provide more than one day for treatment in order to minimise disturbance (15,17,27).

The lower loss to follow up at the North of Durban clinic may be attributed to the experience gained while operation at the first clinic (South of Durban). A praziquantel mass treatment programme was implemented in South Africa, in Ugu District of KwaZulu-Natal Province between 1998 and 2001 among grade 10 – 12 learners, teachers, community health workers and traditional healers, and only reached 44% of the learners instead of the WHO and the

South African National Department of Health recommended target of 75% coverage (27). This shows a need to embark on large scale awareness and advocacy campaign in schools and communities, coordinated by the Department of Health and in collaboration with the Department of Basic Education, non-governmental organisations and community leaders, before implementing FGS studies among young people and mass treatment administration, to improve participation in research that will inform control measures.

Study limitations include the small sample size to determine the effect of treatment due to low treatment coverage and loss to follow up. Another limitation was that treatment was not done immediately after baseline, and therefore many learners were not treated between baseline and follow up either due to factors described above by Lothe *et al* in the qualitative studies in Ugu District, KwaZulu-Natal Province (16,17). As a result, some learners that were not treated between baseline and follow up were only treated during follow-up. Some of the learners under 16 years might already have had chronic lesions, and inclusion of the Grade 12 learners could have contributed to loss to follow up because of those who passed matric and moved to tertiary institutions the following year.

In summary, it is critical to conduct vigorous ongoing community engagements for awareness and buy-in prior to mass treatment and gynaecological investigations in order to improve community participation. Because of the small sample size due to loss to follow-up, it is difficult to draw firm conclusions about the effect of treatment on FGS lesions.

## AUTHOR CONTRIBUTION

**Takalani Girly Nemungadi** conceived the presented idea, carried out the laboratory and statistical analysis, contributed to the writing and finalisation of the manuscript

**Eyrun F. Kjetland** helped conceive the presented idea, supervised the project, carried out statistical analysis, contributed to the writing and finalisation of the manuscript

**Saloshni Naidoo** helped supervise the project and contributed to writing

**Elisabeth Kleppa** contributed to conceptualisation and writing

**Hashini Nilushika Galappaththi-Arachchige** contributed to conceptualisation and writing

**Pavitra Pillay** contributed to conceptualisation and writing

**Svein Gunnar Gundersen** contributed to conceptualisation and writing

**Birgitte Jyding Vennervald** contributed to conceptualisation and writing

**Patricia Ndhlovu** contributed to conceptualisation and writing

**Myra Taylor** contributed to conceptualisation and writing

## ACKNOWLEDGMENTS

We are appreciative of the support from Roy Manyaira, Silindile Gagai and other staff at BRIGHT Research in KwaZulu-Natal, South Africa. We thank all the girls and young women who participated in the study.

## CONFLICTS OF INTEREST

All authors report no conflicts of interest.

## REFERENCES

1. Hegertun IEA, Sulheim Gundersen KM, Kleppa E, Zulu SG, Gundersen SG, Taylor M, et al. *S. haematobium* as a Common Cause of Genital Morbidity in Girls: A Cross-sectional Study of Children in South Africa. *PLoS Negl Trop Dis*. 2013;7(3):e2104 (1-8).
2. UNAIDS, World Health Organization. No more neglect. Female genital schistosomiasis and HIV. Integrating reproductive health interventions to improve women's lives [Internet]. Geneva, Switzerland; 2019 [cited 2020 Mar 12]. Available from: [https://www.unaids.org/sites/default/files/media\\_asset/female\\_genital\\_schistosomiasis\\_and\\_hiv\\_en.pdf](https://www.unaids.org/sites/default/files/media_asset/female_genital_schistosomiasis_and_hiv_en.pdf)
3. Kjetland EF, Norseth HM, Taylor M, Lillebø K, Kleppa E, Holmen SD, et al. Classification of the lesions observed in female genital schistosomiasis. *Int J Gynaecol Obstet* [Internet]. 2014;127:227–8. Available from: <http://www.scopus.com/inward/record.url?eid=2-s2.0-84906529324&partnerID=MN8TOARS>
4. Kjetland EF, Gwanzura F, Ndhlovu PD, Mduluza T, Gomo E, Mason PR, et al. Simple clinical manifestations of genital *Schistosoma haematobium* infection in rural Zimbabwean women. *Am J Trop Med Hyg* [Internet]. 2005 Mar;72(3):311–9. Available from: <http://www.ncbi.nlm.nih.gov/pubmed/15772328>
5. Christinet V, Lazdins-Helds JK, Stothard JR, Reinhard-Rupp J. Female genital schistosomiasis (FGS): from case reports to a call for concerted action against this neglected gynaecological disease. *Int J Parasitol*. 2016 Jun 1;46(7):395–404.
6. World Health Organisation. Ending the neglect to attain the Sustainable Development Goals: A road map for neglected tropical diseases 2021–2030. Geneva, Switzerland: World Health Organisation; 2020. 1–196 p.
7. Kjetland EF, Leutscher PDC, Ndhlovu PD. A review of female genital schistosomiasis. *Trends Parasitol* [Internet]. 2012;28(2):58–65. Available from: <http://www.ncbi.nlm.nih.gov/pubmed/22245065>
8. Eustace D, Trehan A, Raju KS, Derias N, Pambakian H. Abdominal pain and vaginal bleeding associated with schistosomiasis of the genital tract. *J Obstet Gynaecol (Lahore)* [Internet]. 2009;12(6):427–8. Available from: <https://doi.org/10.3109/01443619209025953>
9. Alalade AO, Leeson SC, Andrady U. An unusual association: Vulval schistosomiasis, microinvasive vulval squamous cell carcinoma and high-grade vulval intraepithelial neoplasia in HIV patient. *Gynecol Surg*. 2009;6(2):177–9.
10. Kjetland EF, Ndhlovu PD, Mduluza T, Deschoolmeester V, Midzi N, Gomo E, et al. The effects of genital *Schistosoma haematobium* on human papillomavirus and the development of neoplasia after 5 years in a Zimbabwean population. A pilot study. *Eur J Gynec Oncol* [Internet]. 2010/06/10. 2010;31(2):169–73. Available from: [http://www.ncbi.nlm.nih.gov/entrez/query.fcgi?cmd=Retrieve&db=PubMed&dopt=Citation&list\\_uids=20527233](http://www.ncbi.nlm.nih.gov/entrez/query.fcgi?cmd=Retrieve&db=PubMed&dopt=Citation&list_uids=20527233)
11. Lalaina N, Irène RZ, Patrick M, Gabriël RP, Soa R. Schistosomiasis with Cervical Cancer: About 2 Cases and Literature Review. *Open J Pathol*. 2021;11(01):1–6.
12. Kutz JM, Rausche P, Rasamoelina T, Ratefiarisoa S, Razafindrakoto R, Klein P, et al. Female genital schistosomiasis, human papilloma virus infection, and cervical cancer in rural Madagascar: a cross sectional study. *Infect Dis poverty* [Internet]. 2023;12(1):89. Available from: <https://doi.org/10.1186/s40249-023-01139-3>
13. Kjetland EF, Ndhlovu PD, Kurewa EN, Midzi N, Gomo E, Mduluza T, et al. Prevention of gynecologic contact bleeding and genital sandy patches by childhood anti-schistosomal treatment. *Am J Trop Med Hyg* [Internet]. 2008/07/09. 2008

- Jul;79(1):79–83. Available from:  
[http://www.ncbi.nlm.nih.gov/entrez/query.fcgi?cmd=Retrieve&db=PubMed&dopt= Citation&list\\_uids=18606767](http://www.ncbi.nlm.nih.gov/entrez/query.fcgi?cmd=Retrieve&db=PubMed&dopt= Citation&list_uids=18606767)
14. World Health Organisation. Deworming adolescent girls and women of reproductive age: Policy brief [Internet]. 2021. Available from:  
<https://www.who.int/publications/i/item/9789240037670>
15. World Health Organization. Helminth control in school-age children: A guide for managers of control programmes. 2011.
16. Lothe A, Oyhus AO. Treating Bilharzia among High School Pupils. A study of opportunities and constraints for treating Bilharzia among high school pupils in Ugu district, South Africa. Vol. Masters, Faculty of Economics and Social Sciences. [Development Management]: Agder University College; 2012.
17. Lothe A, Zulu N, Øyhus AO, Kjetland EF, Taylor M. Treating schistosomiasis among South African high school pupils in an endemic area, a qualitative study. BMC Infect Dis. 2018;18(1):1–10.
18. Kukula VA, MacPherson EE, Tsey IH, Stothard JR, Theobald S, Gyapong M. A major hurdle in the elimination of urogenital schistosomiasis revealed: Identifying key gaps in knowledge and understanding of female genital schistosomiasis within communities and local health workers. Hsieh MH, editor. PLoS Negl Trop Dis [Internet]. 2019 Mar 21 [cited 2019 Apr 2];13(3):e0007207. Available from:  
<http://dx.plos.org/10.1371/journal.pntd.0007207>
19. Sommerfelt I, Ndhlovu P, Taylor M, Naidoo S, Pillay P, Haaland H, et al. Health professionals’ knowledge about female genital schistosomiasis. A qualitative investigation in a schistosomiasis endemic area in South Africa. SSM - Qual Res Heal [Internet]. 2023 Jun 1 [cited 2023 Jun 26];3:100292. Available from:  
<https://linkinghub.elsevier.com/retrieve/pii/S2667321523000768>
20. Toller A, Scopin AC, Apfel V, Prigenzi KC, Tso FK, Focchi GR, et al. An interesting finding in the uterine cervix: Schistosoma hematobium calcified eggs. Autops Case Rep [Internet]. 2015/10/21. 2015;5(2):41–4. Available from:  
<http://www.ncbi.nlm.nih.gov/pubmed/26484333>
21. Mazigo HD, Samson A, Lambert VJ, Kosia AL, Ngoma DD, Murphy R, et al. “We know about schistosomiasis but we know nothing about FGS”: A qualitative assessment of knowledge gaps about female genital schistosomiasis among communities living in *Schistosoma haematobium* endemic districts of Zanzibar and Northwestern Tanzania. Knopp S, editor. PLoS Negl Trop Dis [Internet]. 2021 Sep 30 [cited 2021 Oct 4];15(9):e0009789. Available from:  
<https://journals.plos.org/plosntds/article?id=10.1371/journal.pntd.0009789>
22. Engels D, Hotez PJ, Ducker C, Gyapong M, Bustinduy AL, Secor WE, et al. Integration of prevention and control measures for female genital schistosomiasis, HIV and cervical cancer. Bull World Health Organ. 2020;98(9):615–24.
23. Søfteland S, Sebitloane MH, Taylor M, Roald BB, Holmen S, Galappaththi-Arachchige HN, et al. A systematic review of handheld tools in lieu of colposcopy for cervical neoplasia and female genital schistosomiasis. Int J Gynecol Obstet [Internet]. 2021 Feb 12 [cited 2021 Feb 9];153(2):190–9. Available from:  
<https://onlinelibrary.wiley.com/doi/10.1002/ijgo.13538>
24. Norseth HM, Ndhlovu PD, Kleppa E, Randrianasolo BS, Jourdan PM, Roald B, et al. The colposcopic atlas of schistosomiasis in the lower female genital tract based on studies in Malawi, Zimbabwe, Madagascar and South Africa. PLoS Neglected Trop Dis [Internet]. 2014 Nov;8(11):e3229 (1-17). Available from:  
<http://europepmc.org/abstract/med/25412334>
25. Mbabazi PS, Vwalika B, Randrianasolo BS, Roald B, Ledzinski D, Olowookorun F, et al. World Health Organisation Female genital schistosomiasis. A pocket atlas for clinical health-care professionals [Internet]. Vol. 2015, WHO/HTM/NTD/2015.4.

- Geneva: WHO; 2015. 1–49 p. Available from:  
[http://apps.who.int/iris/bitstream/10665/180863/1/9789241509299\\_eng.pdf](http://apps.who.int/iris/bitstream/10665/180863/1/9789241509299_eng.pdf)
26. Kjetland EF, Kurewa EN, Ndhlovu PD, Midzi N, Gwanzura L, Mason PR, et al. Female genital schistosomiasis - a differential diagnosis to sexually transmitted disease: Genital itch and vaginal discharge as indicators of genital *S. haematobium* morbidity in a cross-sectional study in endemic rural Zimbabwe. *Trop Med Int Heal*. 2008;13(12):1509–17.
27. Randjelovic A, Frønæs SG, Munsami M, Kvalsvig JD, Zulu SG, Gagai S, et al. A study of hurdles in mass treatment of schistosomiasis in KwaZulu-Natal, South Africa. *South African Fam Pract* [Internet]. 2015 [cited 2019 Jun 3];57(2):57–61. Available from:  
<https://www.tandfonline.com/action/journalInformation?journalCode=ojfp20><http://dx.doi.org/10.1080/20786190.2014.978121>
28. Berge ST, Kabatereine NB, Gundersen SG, Taylor M, Kvalsvig JD, Mkhize-Kwitshana Z, et al. Generic praziquantel in South Africa: The necessity for policy change to avail cheap, safe and efficacious schistosomiasis drugs to the poor, rural population. *South Afr J Epidemiol Infect* [Internet]. 2011 [cited 2013 Jan 26];26(1):22–5. Available from: <http://sajei.co.za/index.php/SAJEI/article/view/302>
29. National Department of Health. Schistosomiasis Mass Drug Administration Plan. National Department of Health, South Africa; 2023. 1–31 p.
30. Galappaththi-Arachchige HN, Holmen S, Koukounari A, Kleppa E, Pillay P, Sebitloane M, et al. Evaluating diagnostic indicators of urogenital *Schistosoma haematobium* infection in young women: A cross sectional study in rural South Africa. *PLoS One*. 2018;13(2):1–15.
31. Republic of South Africa. Children’s Act, 2005. Government Gazette, 28944 South Africa: Government Gazette; 2006 p. 48.
32. Nguyen VK, Eaton JW. Trends and country-level variation in age at first sex in sub-Saharan Africa among birth cohorts entering adulthood between 1985 and 2020. *BMC Public Health* [Internet]. 2022;22(1):1–11. Available from:  
<https://doi.org/10.1186/s12889-022-13451-y>
33. Chartsbin. No Title [Internet]. [cited 2023 Jan 18]. Available from:  
<http://chartsbin.com/view/xxj>
34. Mkasi L, Rafudeen A. Debating Virginity-testing Cultural Practices in South Africa: A Taylorian Reflection. *J Study Relig* [Internet]. 2016;29(2016):118–33. Available from:  
<http://www.scielo.org.za/pdf/jsr/v29n2/07.pdf>
35. Durojaye E. The human rights implications of virginity testing in South Africa. *Int J Discrim Law*. 2016;16(4):228–46.
36. Department of Basic Education. School Masterlist Data [Internet]. March 2017. Quarter 4 of 2016. Pretoria; 2017. Available from:  
<https://www.education.gov.za/Programmes/EMIS/EMISDownloads.aspx>
37. Livingston M, Pillay P, Zulu SG, Sandvik L, Kvalsvig JD, Gagai S, et al. Mapping *Schistosoma haematobium* for novel interventions against Female Genital Schistosomiasis and associated HIV risk in KwaZulu-Natal, South Africa. *Am J Trop Med Hyg*. 2021;104(6):2055–2064.
38. National Department of Health. Elimination of Schistosomiasis and Soil Transmitted Helminths as Public Health Problems in South Africa. 2010. p. 1–48.
39. Kleppa E, Ramsuran V, Zulu S, Karlsen GH, Bere A, Passmore J-A, et al. Effect of Female Genital Schistosomiasis and anti- schistosomal treatment on monocytes, CD4+ T-cells and CCR5 expression in the female genital tract. *PLoS One* [Internet]. 2014;9(6):e98593 (1-9). Available from: <http://europepmc.org/abstract/med/24896815>
40. Kleppa E, Klinge KF, Galappaththi-Arachchige HN, Holmen SD, Lillebø K, Onsrud M, et al. *Schistosoma haematobium* Infection and CD4+ T-cell levels: A cross-sectional study of young South African women. *PLoS One*. 2015;10(3):1–9.

41. Kleppa E, Holmen SD, Lillebø K, Kjetland EF, Gundersen SG, Taylor M, et al. Cervical ectopy: associations with sexually transmitted infections and HIV. A cross-sectional study of high school students in rural South Africa. *Sex Transm Infect*. 2015;91:124–9.
42. Nemungadi TG, Furumele TE, Gugerty MK, Djirmay AG, Naidoo S, Kjetland EF. Establishing and Integrating a Female Genital Schistosomiasis Control Programme into the Existing Health Care System. *Trop Med Infect Dis* 2022, Vol 7, Page 382 [Internet]. 2022 Nov 16 [cited 2022 Nov 21];7(11):382. Available from: <https://www.mdpi.com/2414-6366/7/11/382/htm>
43. South African National Department of Health. Regular treatment of school-going children for soil-transmitted helminth infections and Bilharzia: Policy and implementation guidelines. Pretoria, South Africa: The South African National Department of Health; 2008 p. 38.
44. van Bogaert L. Case of invasive adenocarcinoma of the cervix in a human immunodeficiency virus and schistosome co-infected patient. *South African J Gynaecol Oncol*. 2014;6(1):5–6.
45. Kjetland EF, Mduluzi T, Ndhlovu PD, Gomo E, Gwanzura L, Midzi N, et al. Genital schistosomiasis in women: a clinical 12-month in vivo study following treatment with praziquantel. *Trans R Soc Trop Med Hyg* [Internet]. 2006;100(8):740–52. Available from: <http://www.ncbi.nlm.nih.gov/pubmed/16406034>
46. Downs JA, Kabangila R, Verweij JJ, Jaka H, Peck RN, Kalluvya SE, et al. Detectable urogenital schistosome DNA and cervical abnormalities 6 months after single-dose praziquantel in women with *Schistosoma haematobium* infection. *Trop Med Int Heal* [Internet]. 2013/08/14. 2013;18(9):1090–6. Available from: <http://www.ncbi.nlm.nih.gov/pubmed/23937701>
47. van Bogaert LJ. Schistosomiasis - an endemic but neglected tropical disease in Limpopo. Vol. 100, *South African Medical Journal*. 2010. p. 788–9.
48. Feldmeier H, Poggensee G, Krantz I. A synoptic inventory of needs for research on women and tropical parasitic diseases. II. Gender-related biases in the diagnosis and morbidity assessment of schistosomiasis in women. *Acta Trop* [Internet]. 1993/11/01. 1993 Nov;55(3):139–69. Available from: <http://www.ncbi.nlm.nih.gov/pubmed/7903838>
49. Kukula VA, MacPherson EE, Tsey IH, Stothard JR, Theobald S, Gyapong M. A major hurdle in the elimination of urogenital schistosomiasis revealed: Identifying key gaps in knowledge and understanding of female genital schistosomiasis within communities and local health workers. Hsieh MH, editor. *PLoS Negl Trop Dis*. 2018 Mar;13(3):e0007207.
50. Bland KG, Gelfand M. The effects of schistosomiasis on the cervix uteri in the African female. *J Obstet Gynaecol Br Commonw* [Internet]. 1970/11/01. 1970;77(11):1127–31. Available from: <http://www.ncbi.nlm.nih.gov/pubmed/5493619>
51. Poggensee G, Kiwelu I, Saria M, Richter J, Krantz I, Feldmeier H. Schistosomiasis of the lower reproductive tract without egg excretion in urine. *Am J Trop Med Hyg* [Internet]. 1998;59(5):782–3. Available from: <http://www.ncbi.nlm.nih.gov/htbin-post/Entrez/query?db=m&form=6&dopt=r&uid=0009840597>
